# Supplementary material
Source: publisher figshare collection journal article supplement (https://acs.figshare.com/ndownloader/files/10246524)
Supplement: Supplementary file 1 [file 10246524]

Supporting Information for

# **Metallopolymer-Based Block Copolymers for the Preparation of Porous and Redox-Responsive Materials**

*Christian Rüttiger<sup>1</sup>, Hanna Hübner<sup>1</sup>, Sebastian Schöttner<sup>1</sup>, Tamara Winter<sup>1</sup>, Gennady Cherkashinin<sup>2</sup>, Björn Kuttich<sup>3</sup>, Bernd Stühn<sup>3</sup> and Markus Gallei<sup>1,\*</sup>*

<sup>1</sup>Ernst-Berl-Institute for Chemical Engineering and Macromolecular Science, Technische Universität Darmstadt, Alarich-Weiss-Str. 4, D-64287 Darmstadt, Germany

<sup>2</sup>Surface Science, Institute of Materials Science, Technische Universität Darmstadt, Jovanka-Bontschits-Str. 2, D-64287 Darmstadt, Germany

<sup>3</sup>Institute of Condensed Matter Physics, Technische Universität Darmstadt, Hochschulstraße 8, D-64289 Darmstadt, Germany

Corresponding author: m.gallei@mc.tu-darmstadt.de

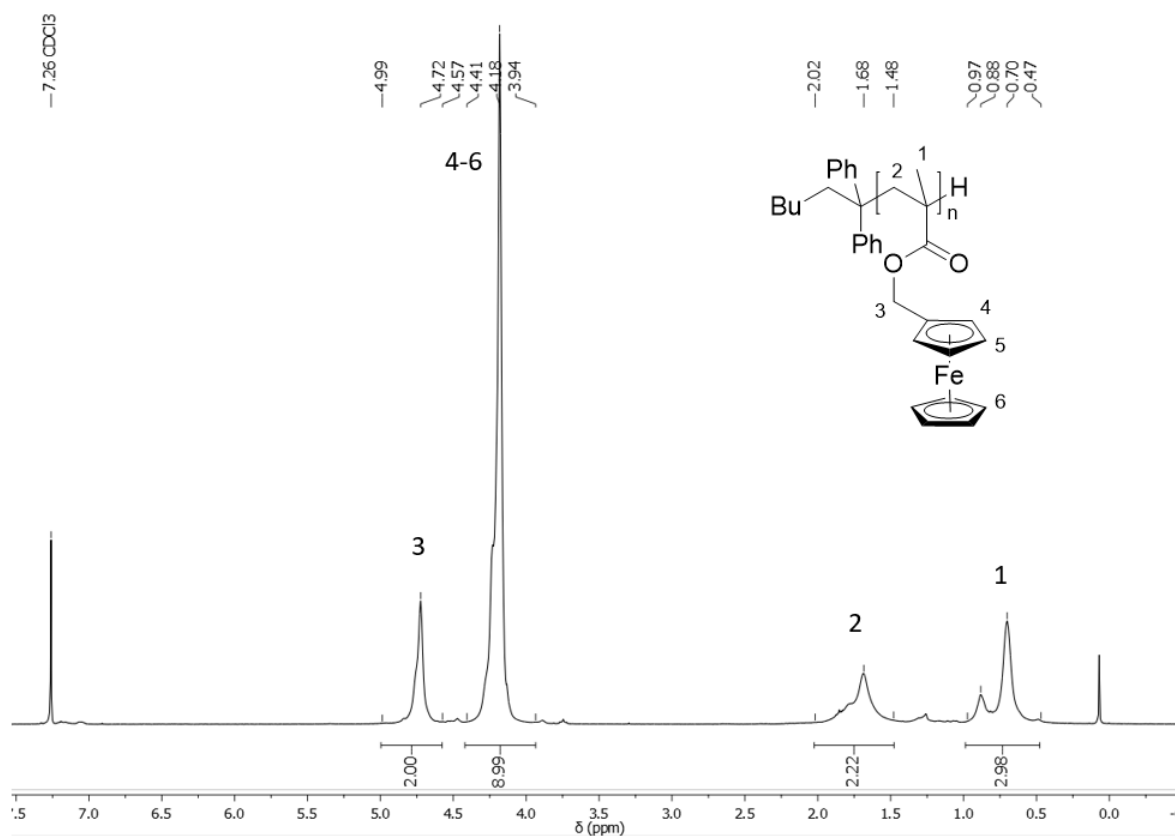

**Figure S1.**  $^1\text{H}$  NMR spectrum of PFMMA<sub>100</sub> in  $\text{CDCl}_3$ .

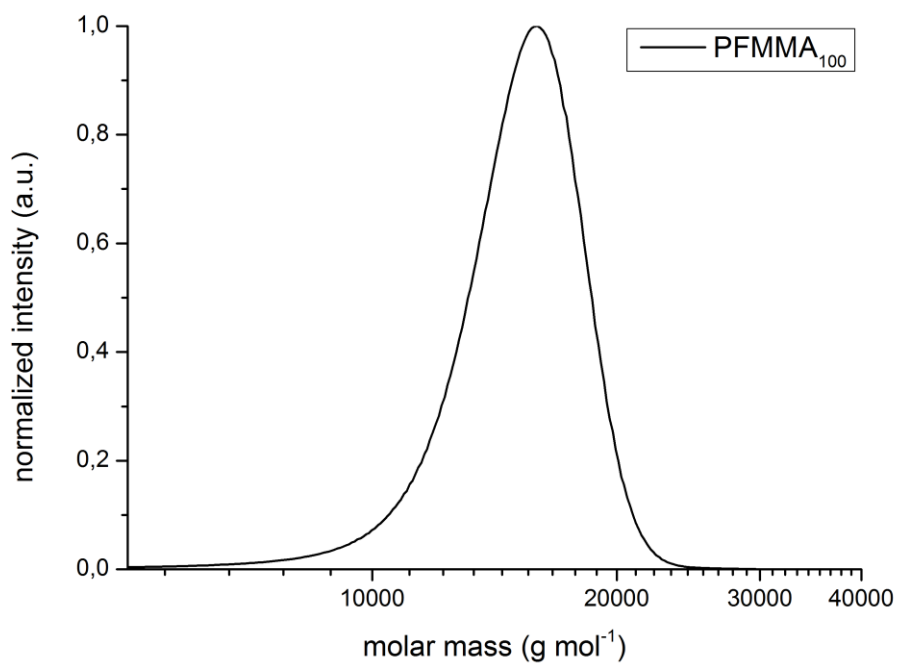

**Figure S2.** Molar mass distribution obtained by SEC measurements vs. PS standards in THF as eluent for PFMMA<sub>100</sub> (black line).

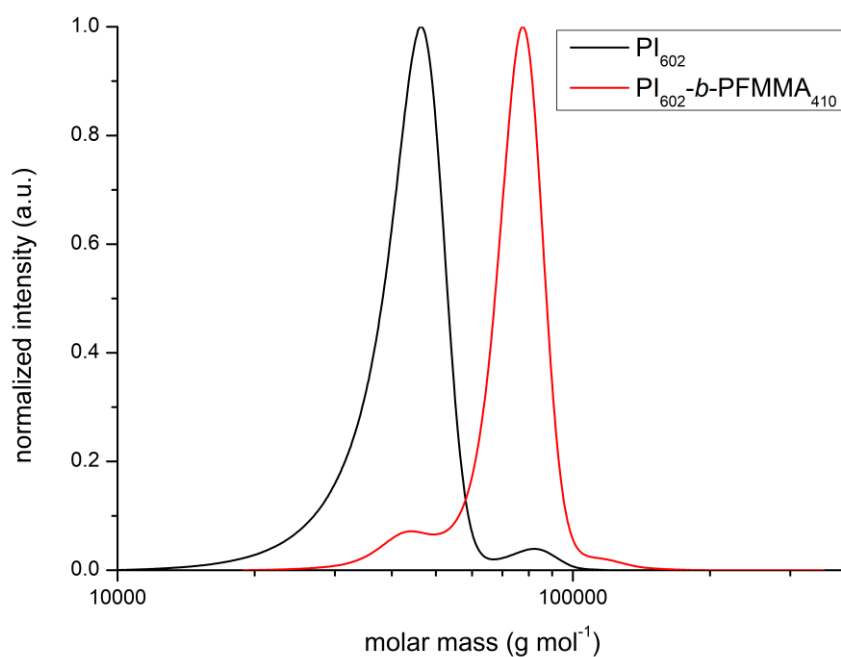

**Figure S3.** Molar mass distributions obtained by SEC measurements vs. PS standards in THF as eluent for  $\text{PI}_{602}$  precursor (black line) and  $\text{PI}_{602}\text{-}b\text{-PFMMA}_{410}$  (red line).

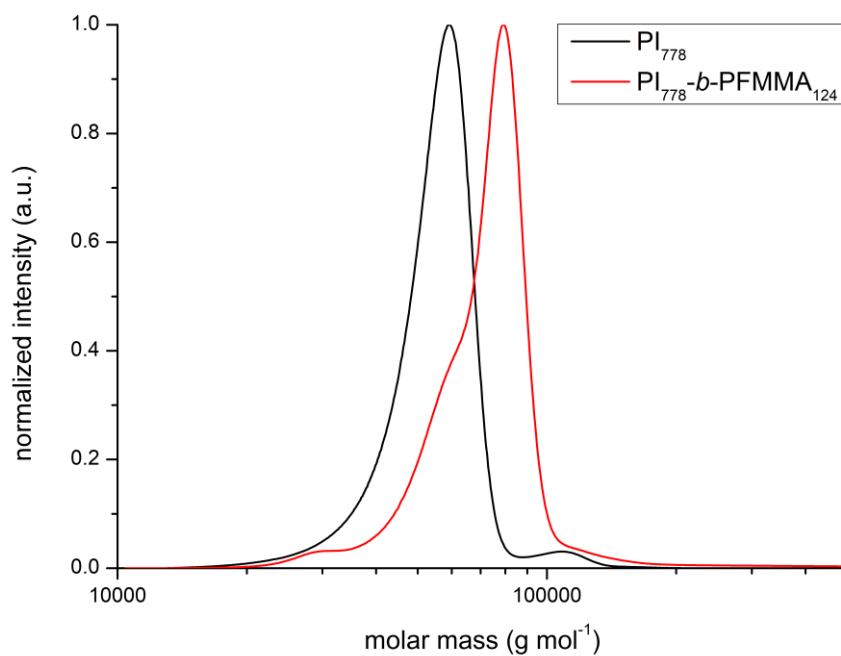

**Figure S4.** Molar mass distributions obtained by SEC measurements vs. PS standards in THF as eluent for  $\text{PI}_{778}$  precursor (black line) and  $\text{PI}_{778}\text{-}b\text{-PFMMA}_{124}$  (red line).

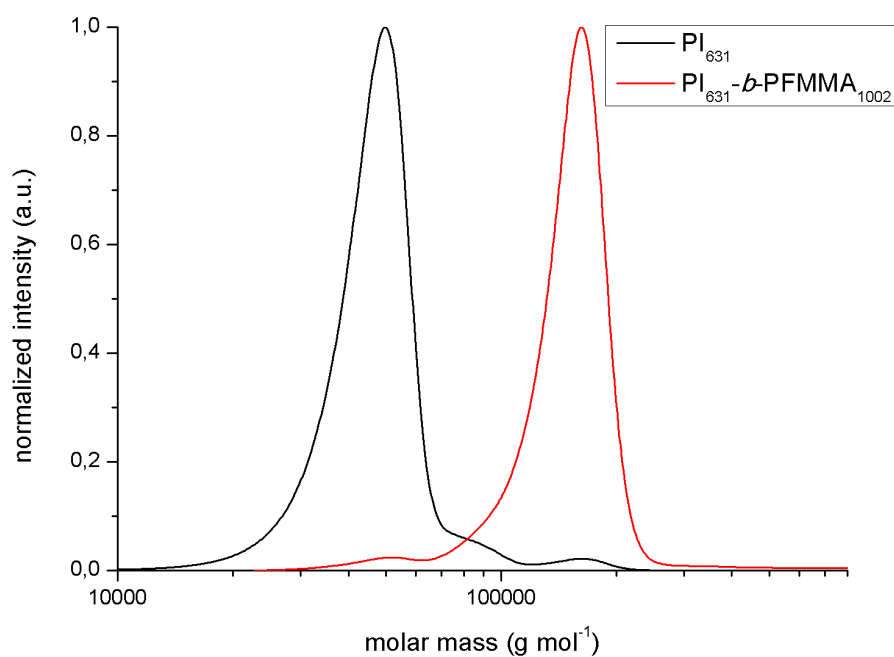

**Figure S5.** Molar mass distributions obtained by SEC measurements vs. PS standards in THF as eluent for  $\text{PI}_{631}$  precursor (black line) and  $\text{PI}_{631}\text{-}b\text{-PFMMA}_{1002}$  (red line).

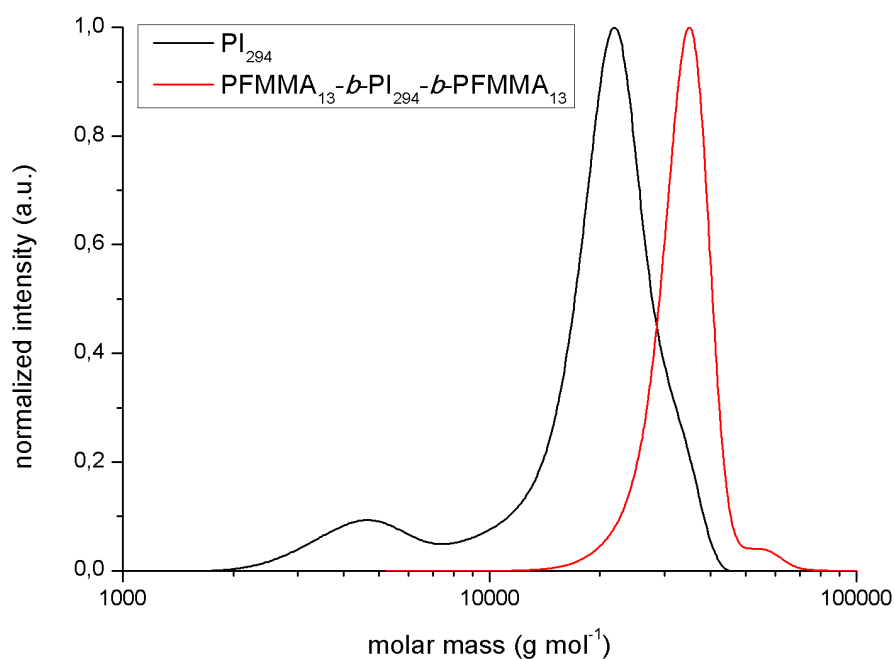

**Figure S6.** Molar mass distributions obtained by SEC measurements vs. PS standards in THF as eluent for  $\text{PI}_{294}$  precursor (black line) and  $\text{PFMMA}_{13}\text{-}b\text{-PI}_{294}\text{-}b\text{-PFMMA}_{13}$  (red line).

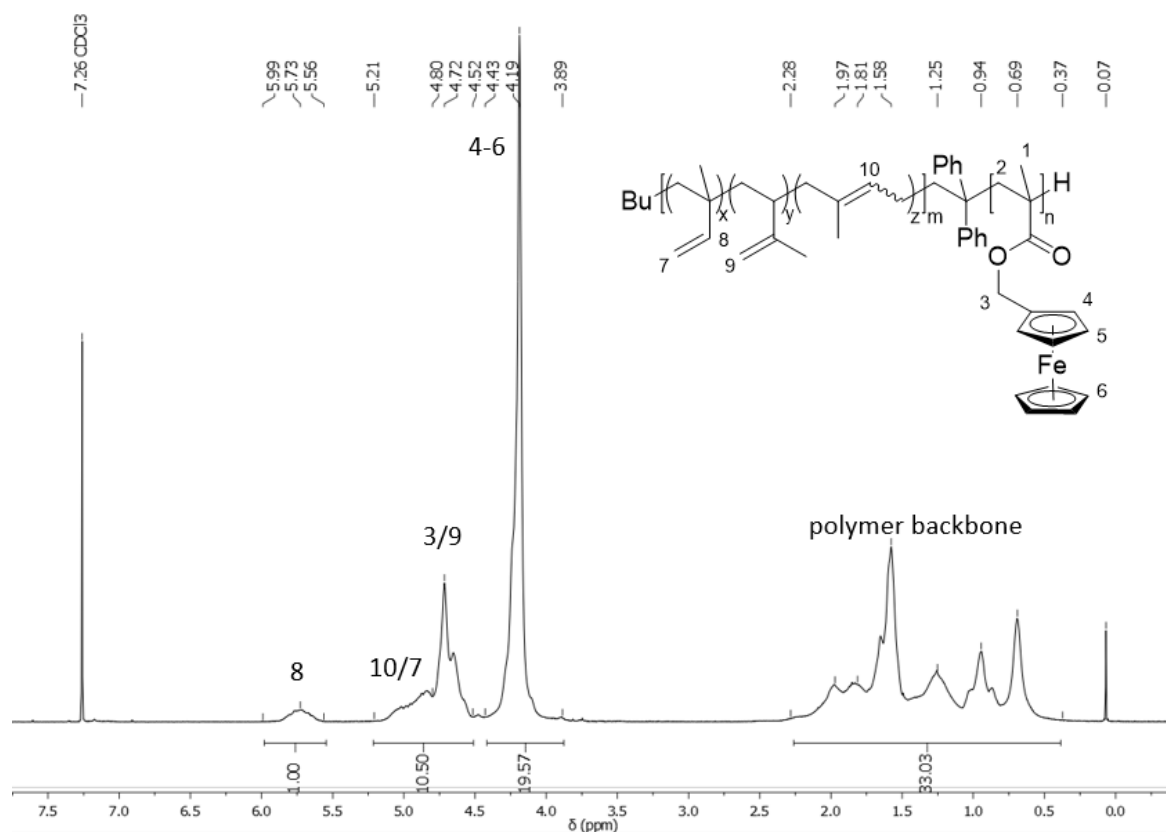

**Figure S7.** <sup>1</sup>H NMR spectrum of PI<sub>602</sub>-*b*-PFMMA<sub>410</sub> in CDCl<sub>3</sub>.

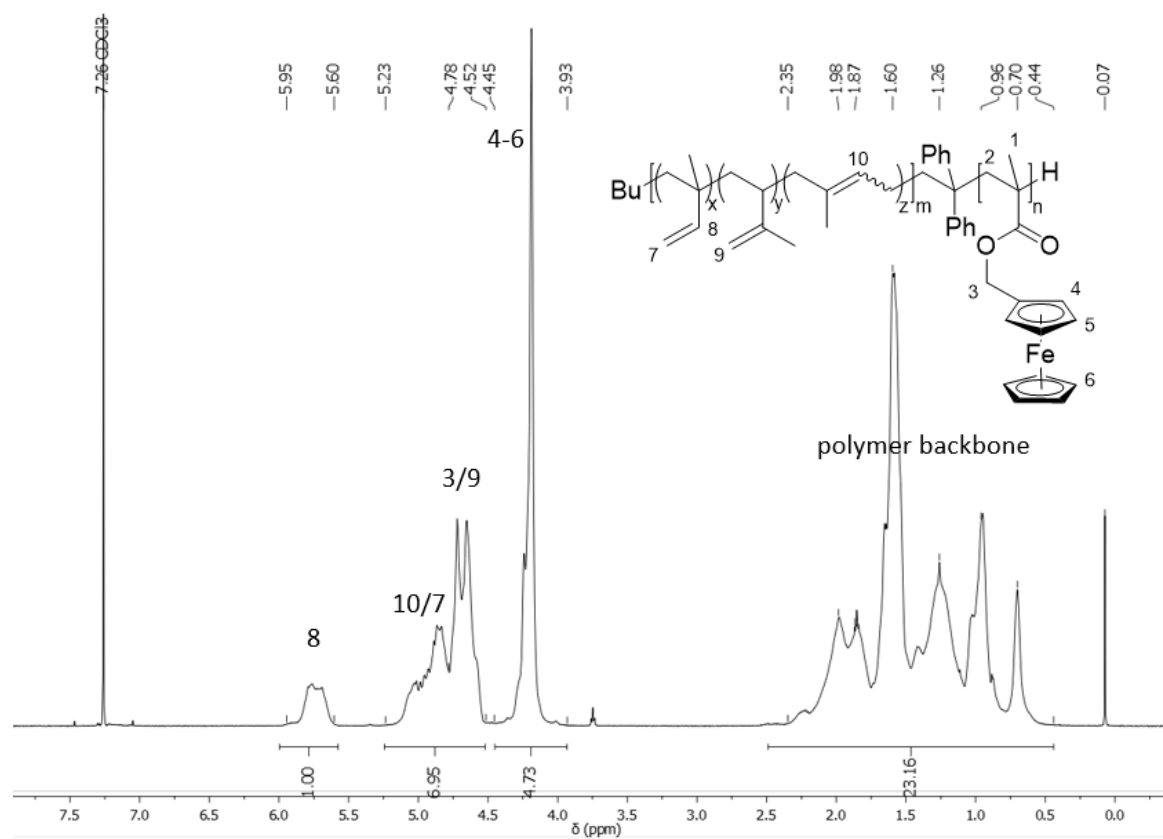

**Figure S8.** <sup>1</sup>H NMR spectrum of PI<sub>778</sub>-*b*-PFMMA<sub>124</sub> in CDCl<sub>3</sub>.

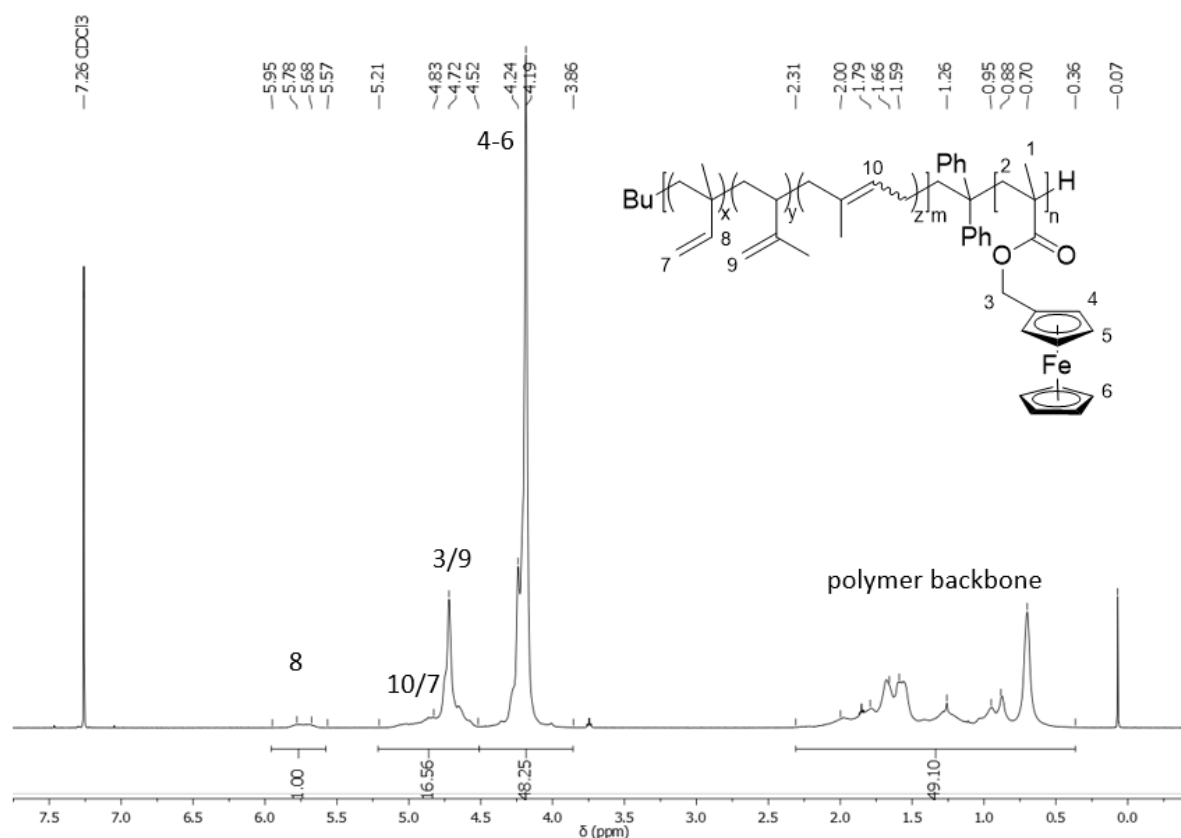

**Figure S9.** <sup>1</sup>H NMR spectrum of PI<sub>631</sub>-*b*-PFMA<sub>1002</sub> in CDCl<sub>3</sub>.

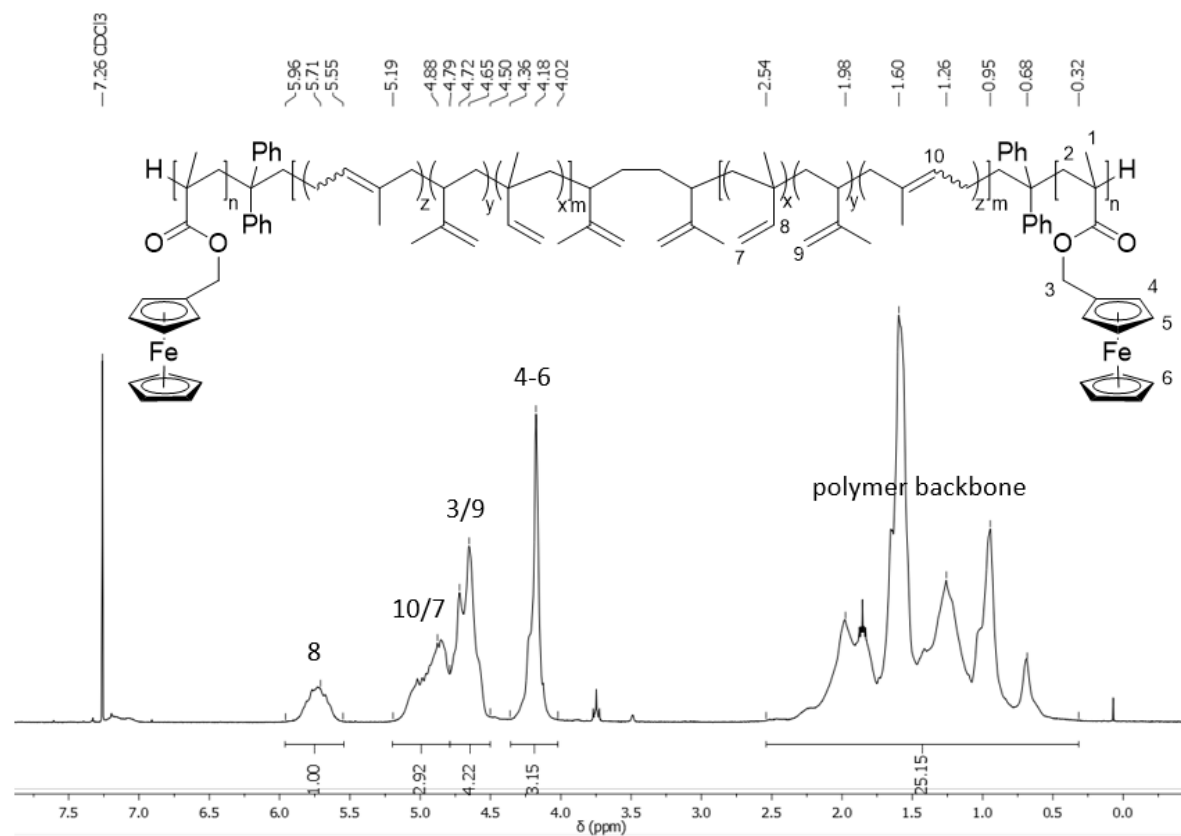

**Figure S10.** <sup>1</sup>H NMR spectrum of PFMA<sub>13</sub>-*b*-PI<sub>294</sub>-*b*-PFMA<sub>13</sub> in CDCl<sub>3</sub>.

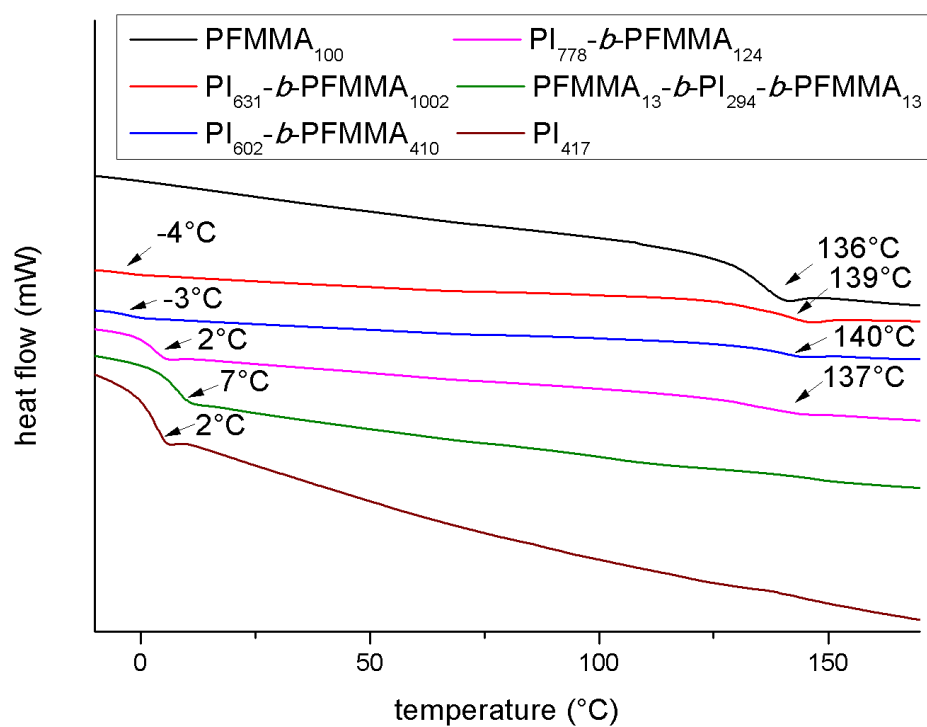

**Figure S11.** DSC thermograms of PFMMA<sub>100</sub> (black line), PI<sub>631</sub>-*b*-PFMMA<sub>1002</sub> (red line), PI<sub>602</sub>-*b*-PFMMA<sub>410</sub> (blue line), PI<sub>778</sub>-*b*-PFMMA<sub>124</sub> (pink line), PFMMA<sub>13</sub>-*b*-PI<sub>294</sub>-*b*-PFMMA<sub>13</sub> (green line) and PI<sub>417</sub> (brown line). The applied heat rate for the DSC run was 10 K min<sup>-1</sup> under nitrogen atmosphere.

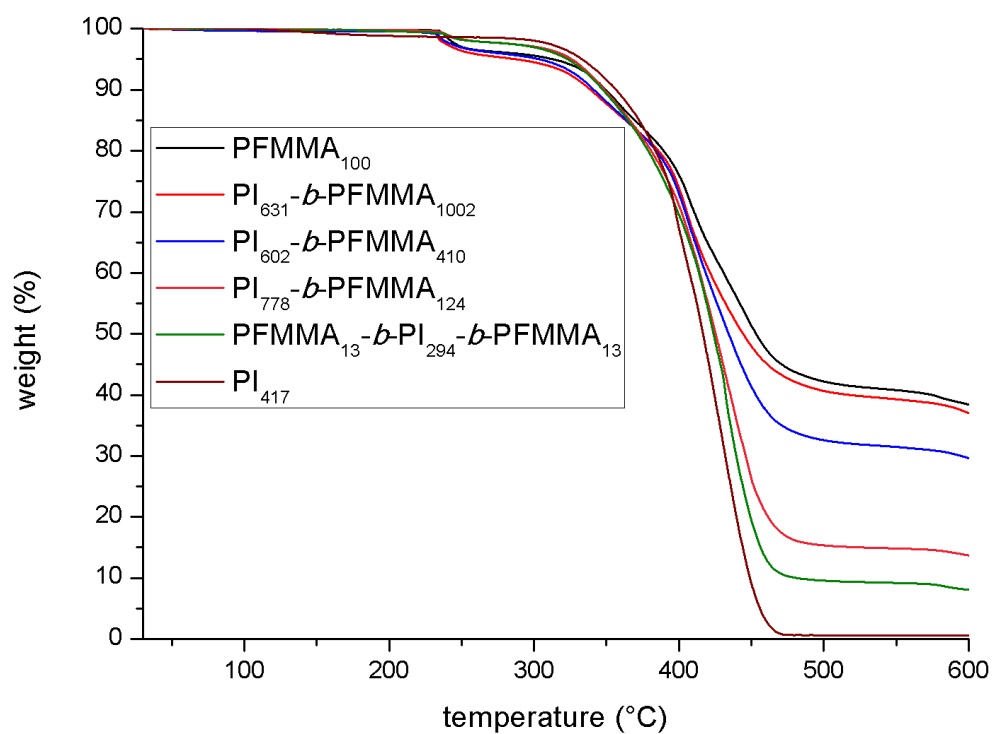

**Figure S12.** TGA curves of PFMMA<sub>100</sub> (black line), PI<sub>631</sub>-*b*-PFMMA<sub>1002</sub> (red line), PI<sub>602</sub>-*b*-PFMMA<sub>410</sub> (blue line), PI<sub>778</sub>-*b*-PFMMA<sub>124</sub> (pink line), PFMMA<sub>13</sub>-*b*-PI<sub>294</sub>-*b*-PFMMA<sub>13</sub> (green line) and PI<sub>417</sub> (brown line). The applied heat rate for the TGA measurements was 10 K min<sup>-1</sup> in a nitrogen atmosphere until 600 °C.



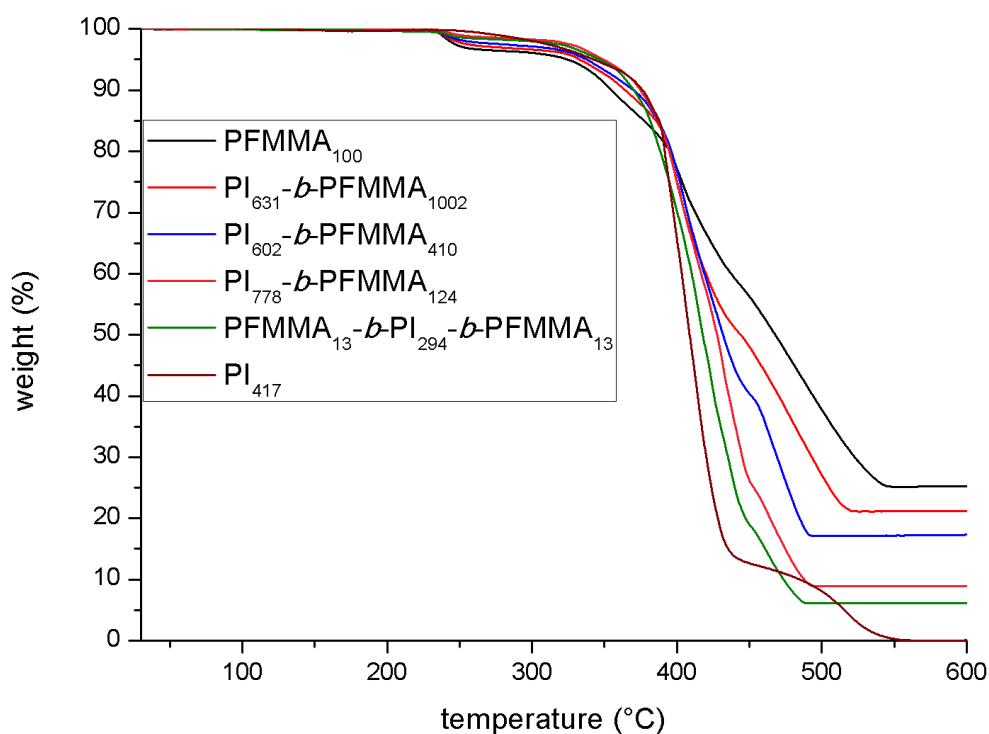

**Figure S13.** TGA thermograms of PFMMA<sub>100</sub> (black line), PI<sub>631</sub>-*b*-PFMMA<sub>1002</sub> (red line), PI<sub>602</sub>-*b*-PFMMA<sub>410</sub> (blue line), PI<sub>778</sub>-*b*-PFMMA<sub>124</sub> (pink line), PFMMA<sub>13</sub>-*b*-PI<sub>294</sub>-*b*-PFMMA<sub>13</sub> (green line) and PI<sub>417</sub> (brown line). The applied heat rate for the TGA measurements was 10 K min<sup>-1</sup> in air atmosphere until 600 °C.

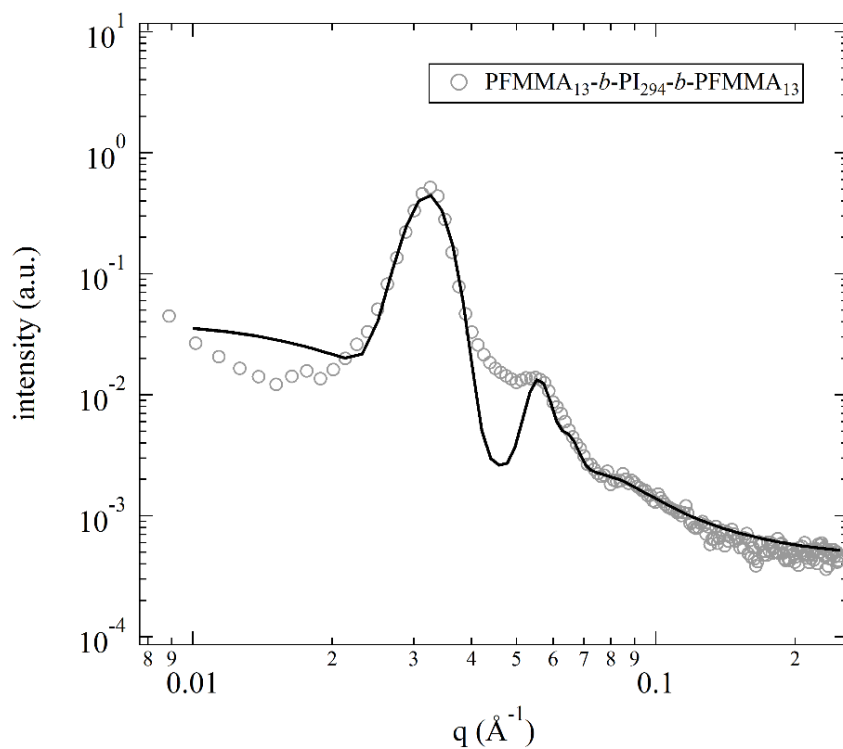

**Figure S14.** SAXS pattern of PFMMA<sub>13</sub>-*b*-PI<sub>294</sub>-*b*-PFMMA<sub>13</sub> sample.

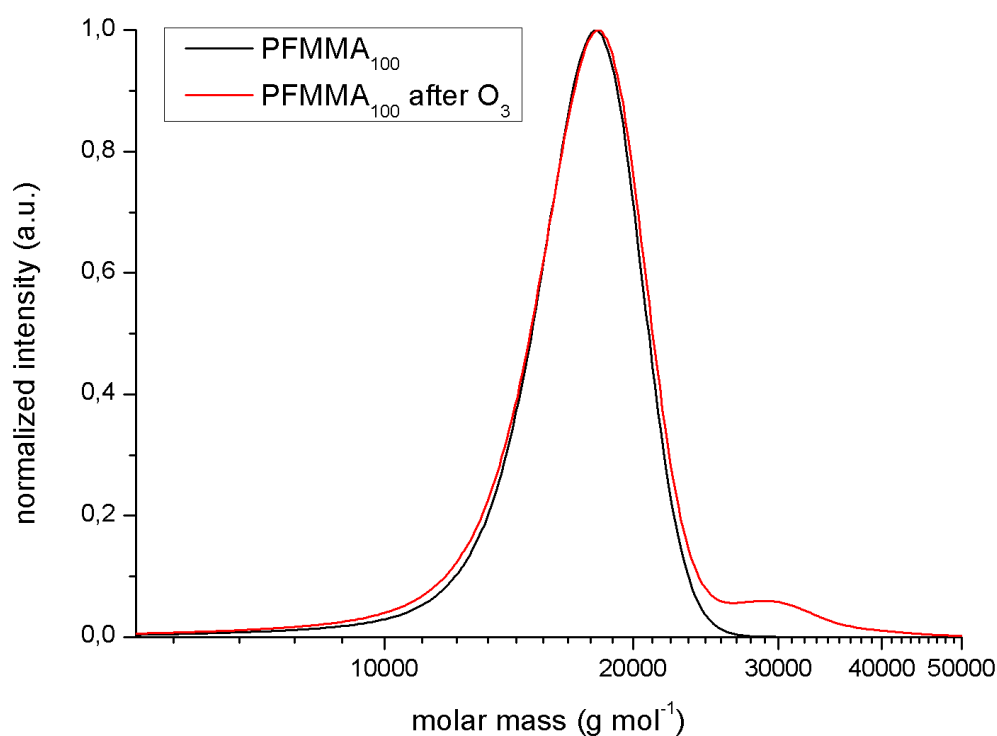

**Figure S15.** Molar mass distributions obtained by SEC measurements vs. PS standards in THF as eluent for PFMMA<sub>100</sub> (black line) and PFMMA<sub>100</sub> after two weeks in an ozone atmosphere (red line).

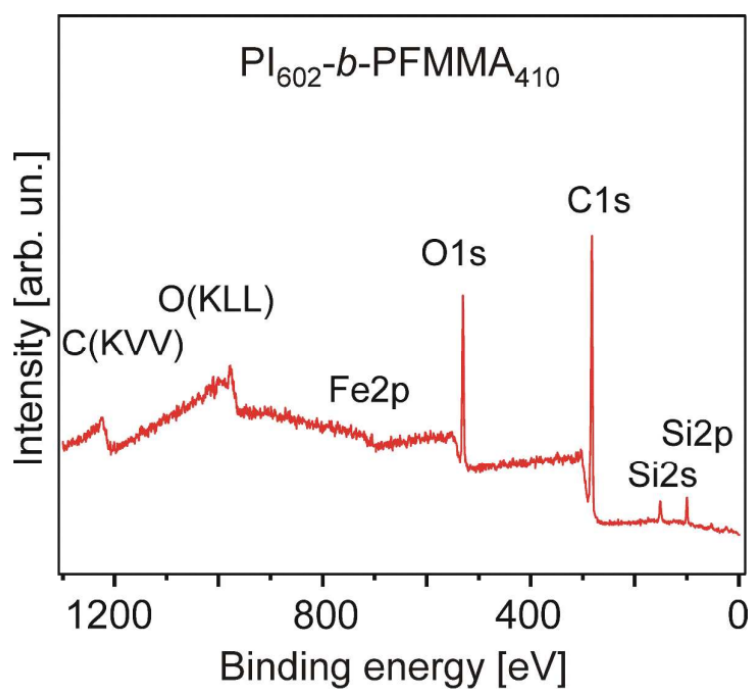

**Figure S16.** Al K $\alpha$  survey photoelectron spectrum of PI<sub>602</sub>-*b*-PFMMA<sub>410</sub> deposited on a paper substrate prior to ozone treatment.

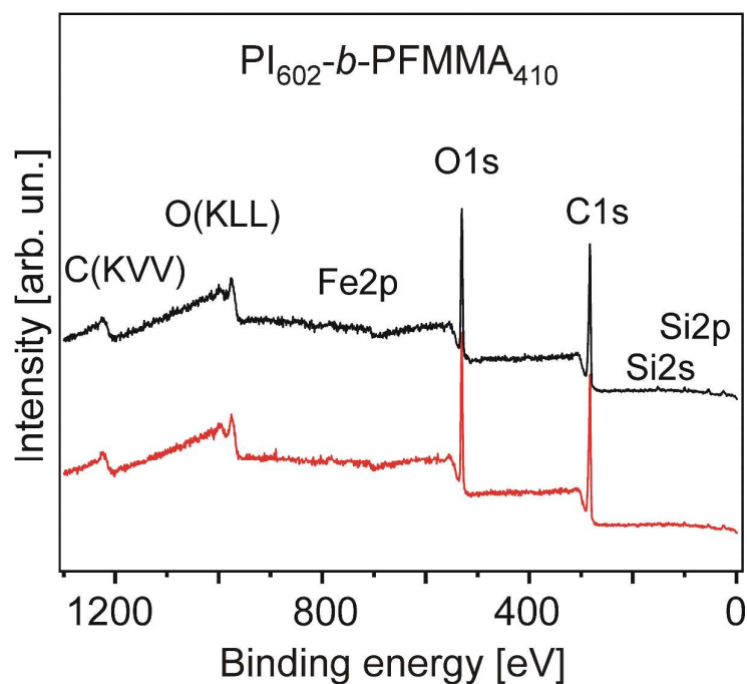

**Figure S17.** Al K $\alpha$  survey photoelectron spectra of PI<sub>602</sub>-*b*-PFMMA<sub>410</sub> deposited on a paper substrate after ozone treatment measured at different areas of the sample.

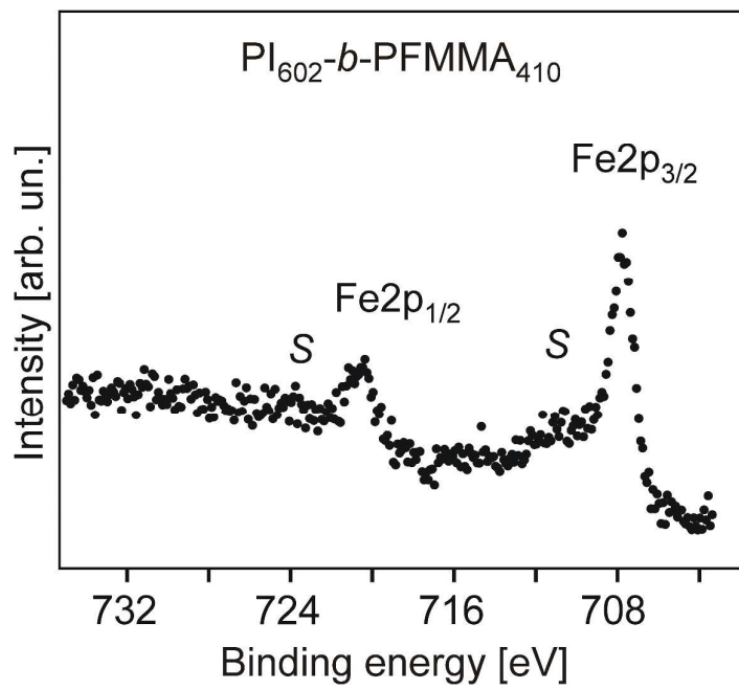

**Figure S18.** Fe2p photoelectron spectrum of PI<sub>602</sub>-*b*-PFMMA<sub>410</sub> deposited on a paper substrate prior to ozone treatment.

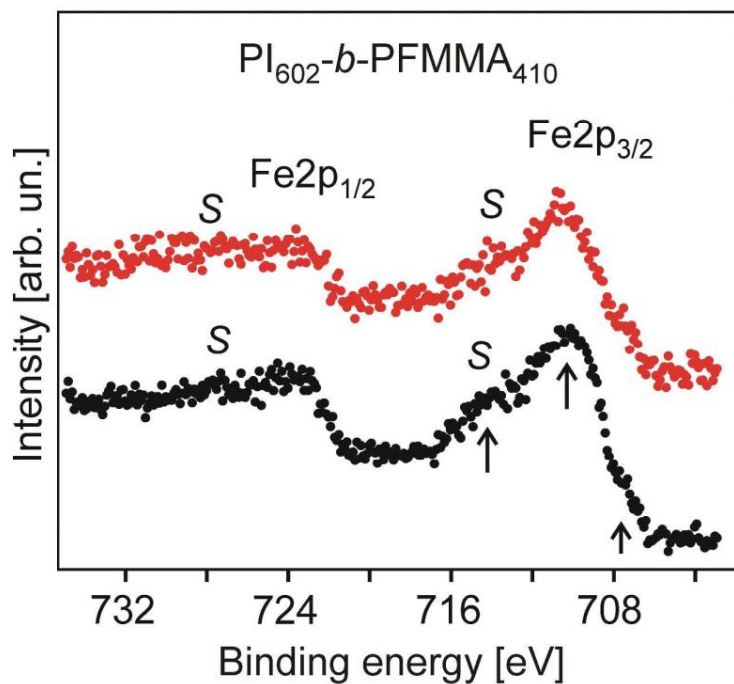

**Figure S19.** Fe2p photoelectron spectrum of sample PI<sub>602</sub>-*b*-PFMMA<sub>410</sub> deposited on a paper substrate after ozone treatment measured at different areas of the sample.

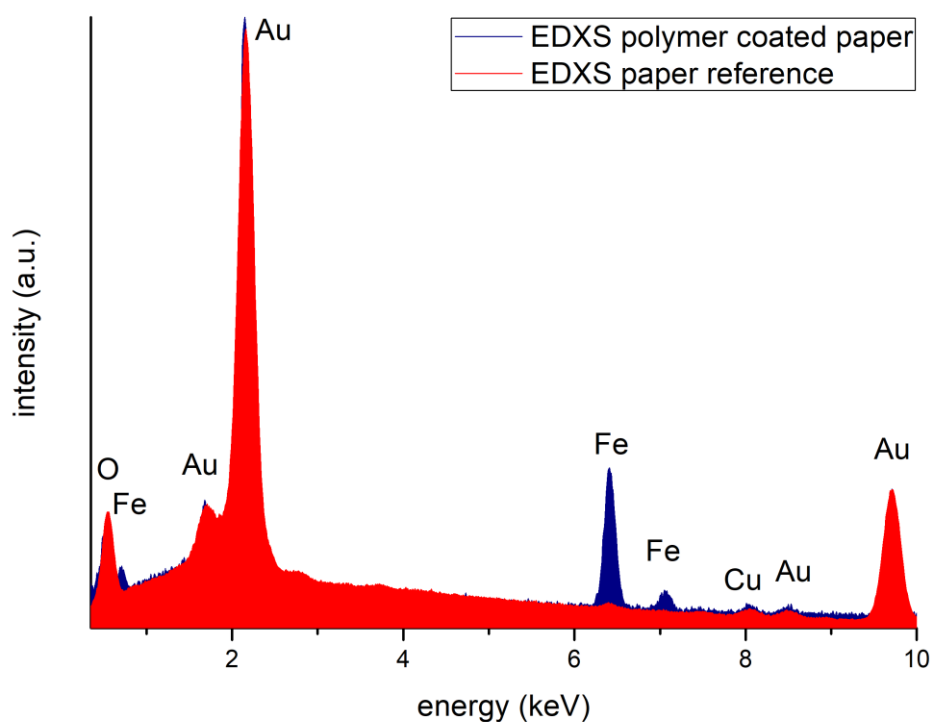

**Figure S20.** EDXS spectra of PI<sub>602</sub>-*b*-PFMMA<sub>410</sub> coated paper substrate (blue) and untreated paper substrate (red) to prove the successful coating with synthesized ferrocene-containing polymer.

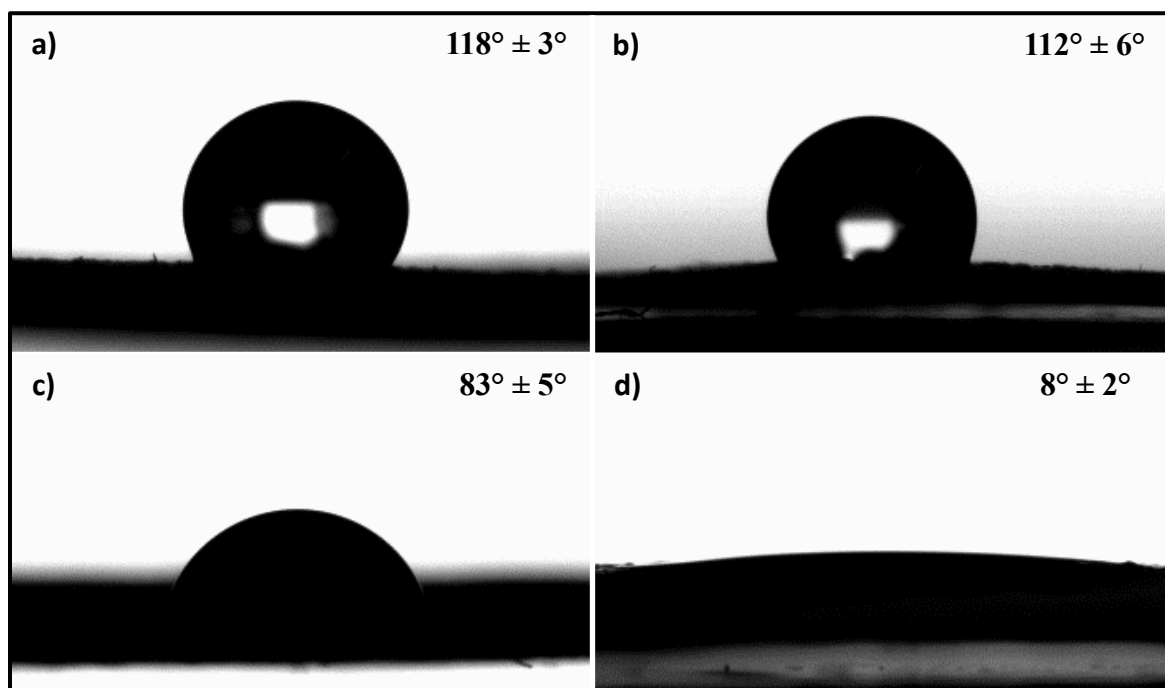

**Figure S21.** Contact angles obtained for PI<sub>602</sub>-*b*-PFMMA<sub>410</sub> coated paper substrates: a) polymer coated paper substrate; b) polymer coated paper substrate after oxidation; c) polymer coated paper substrate after ozone and ethanol treatment; d) polymer coated paper substrate after ozone, ethanol treatment and oxidation.
